# Supplementary material for: Manganese(ii) complexes of hexaazatrinaphthylene and hexaazatrianthracene: synthesis, structure and properties
Source: Royal Society of Chemistry journal article supplement (doi:10.1039/d3nj04615j), 2023-01-01
Supplement: d3nj04615j1.pdf [file d3nj04615j1.pdf]

**Table S1.** IR-spectra ( $\text{cm}^{-1}$  in KBr pellets) of starting compounds and salts **1-3**.

|                    | HATNA                                                                                                                                                   | Mn <sup>II</sup><br>(dedtc) <sub>2</sub>                                                           | Mn <sup>II</sup><br>(acac) <sub>2</sub>                                                                                                                                  | cryptand                                                                                                                                                                      | C <sub>6</sub> H <sub>4</sub> Cl <sub>2</sub> | C <sub>6</sub> H <sub>14</sub> | {Mn <sup>II</sup> (dedtc) <sub>2</sub><br>·HATNA}<br>(1)                                                                                                                                                                                                                                                        | {(K <sup>+</sup> )(crypt)} <sub>2</sub><br>[Mn <sup>II</sup> (dedtc) <sub>2</sub> ] <sub>3</sub><br>(HATNA)] <sup>2-</sup><br>·2C <sub>6</sub> H <sub>4</sub> Cl <sub>2</sub> (2)                                                                                                                                 | {(K <sup>+</sup> )(crypt)} <sub>2</sub><br>[Mn <sup>II</sup> (acac) <sub>2</sub> ] <sub>3</sub><br>(HATNA)] <sup>2-</sup><br>·2C <sub>6</sub> H <sub>4</sub> Cl <sub>2</sub> ·C <sub>6</sub> H <sub>14</sub><br>(3)                                                                                                                                                                                                                                                                                                                                                                      |
|--------------------|---------------------------------------------------------------------------------------------------------------------------------------------------------|----------------------------------------------------------------------------------------------------|--------------------------------------------------------------------------------------------------------------------------------------------------------------------------|-------------------------------------------------------------------------------------------------------------------------------------------------------------------------------|-----------------------------------------------|--------------------------------|-----------------------------------------------------------------------------------------------------------------------------------------------------------------------------------------------------------------------------------------------------------------------------------------------------------------|-------------------------------------------------------------------------------------------------------------------------------------------------------------------------------------------------------------------------------------------------------------------------------------------------------------------|------------------------------------------------------------------------------------------------------------------------------------------------------------------------------------------------------------------------------------------------------------------------------------------------------------------------------------------------------------------------------------------------------------------------------------------------------------------------------------------------------------------------------------------------------------------------------------------|
| HATNA              | 413m<br>501w<br>541w<br>606m<br>757s<br>771m<br>802w<br>1001w<br>1020w<br>1078s<br>1129w<br>1236w<br>1339m<br>1364m<br>1495m<br>1521w<br>1611w<br>3056w |                                                                                                    |                                                                                                                                                                          |                                                                                                                                                                               |                                               |                                | 412m*<br>506w*<br>-<br>608w*<br>753s*<br>-<br>843m<br>994m*<br>1042w<br>1079s*<br>1140s<br>-<br>1342w*<br>1366m*<br>1485s<br>1523sh*<br>1612w*<br>3056w*<br>Mn <sup>II</sup><br>(dedtc) <sub>2</sub><br>406sh*<br>450w*<br>565w<br>653w<br>753s<br>911m*<br>994m<br>1211s<br>1267s<br>1366m*<br>1523sh<br>1612w | 410w*<br>504w*<br>522w<br>618s<br>751s*<br>780m<br>840m<br>997m*<br>1031w<br>1076sh*<br>1134m*<br>1239sh*<br>1318m<br>1371w<br>1466s<br>1483sh<br>1633w<br>3060w*<br>Mn <sup>II</sup><br>(dedtc) <sub>2</sub><br>400w*<br>456w<br>567w<br>657w<br>751s<br>914w*<br>997m<br>1213m<br>1261s<br>1354m<br>1483sh<br>- | 406m*<br>504w*<br>531w<br>602w*<br>755m*<br>779sh*<br>831w<br>1010m<br>-<br>1077sh*<br>1131m*<br>1216w<br>1317m<br>1355m<br>-<br>1510s<br>1600s<br>3064w*<br>Mn <sup>II</sup><br>(acac) <sub>2</sub><br>406m<br>504w*<br>571w*<br>602w*<br>779sh*<br>831w*<br>914w*<br>1010m<br>-<br>1077sh*<br>1104s*<br>1131m*<br>1189w<br>1259m*<br>-<br>1300sh*<br>1355m*<br>-<br>1411s<br>1467m*<br>1510s<br>cryptand<br>471w*<br>522w*<br>751s<br>932w<br>950m*<br>997m<br>1076sh*<br>1104s*<br>1134m*<br>1213m*<br>1300w*<br>1318m<br>1354m*<br>-<br>1466s*<br>1483sh*<br>2818w<br>2883m<br>2928w |
| Mn <sup>II</sup> L |                                                                                                                                                         | 406w<br>446m<br>544m<br>646w<br>769w<br>918w<br>1013w<br>1192w<br>1252s<br>1362s<br>1506s<br>1601s | 419w<br>501w<br>564w<br>598w<br>775w<br>839m<br>911m<br>985m<br>1066w<br>1074m<br>1094w<br>1139s<br>1207s<br>1266s<br>1272s<br>1297m<br>1356m<br>1427s<br>1462w<br>1485s |                                                                                                                                                                               |                                               |                                |                                                                                                                                                                                                                                                                                                                 |                                                                                                                                                                                                                                                                                                                   |                                                                                                                                                                                                                                                                                                                                                                                                                                                                                                                                                                                          |
| crypt              |                                                                                                                                                         |                                                                                                    |                                                                                                                                                                          | cryptand<br>476w<br>528w<br>735m<br>922m<br>948w<br>982m<br>1071m<br>1100s<br>1127s<br>1213w<br>1295m<br>1329m<br>1360s<br>1446m<br>1462m<br>1490w<br>2790w<br>2877w<br>2943w |                                               |                                |                                                                                                                                                                                                                                                                                                                 |                                                                                                                                                                                                                                                                                                                   |                                                                                                                                                                                                                                                                                                                                                                                                                                                                                                                                                                                          |

|         |  |  |  |  |                                                         |                                                                         |  |                                                           |                                                                                                                                        |
|---------|--|--|--|--|---------------------------------------------------------|-------------------------------------------------------------------------|--|-----------------------------------------------------------|----------------------------------------------------------------------------------------------------------------------------------------|
| solvent |  |  |  |  | $C_6H_4Cl_2$<br>657w<br>748s<br>1030m<br>1122m<br>1453m | $C_6H_{14}$<br>722s<br>758w<br>882m<br>1060m<br>1342m<br>1373s<br>1460s |  | $C_6H_4Cl_2$<br>657w<br>751s*<br>1031w*<br>1134m<br>1466s | $C_6H_4Cl_2$<br>651w*<br>755m*<br>1010m<br>1131m<br>1467m<br>$C_6H_{14}$<br>-<br>755m*<br>885sh*<br>1077sh<br>1355m<br>1411s<br>1467m* |
|---------|--|--|--|--|---------------------------------------------------------|-------------------------------------------------------------------------|--|-----------------------------------------------------------|----------------------------------------------------------------------------------------------------------------------------------------|

\*bands coincide, w - weak, m - middle, s – strong, sh- shoulder .

**Table S2.** IR-spectra (cm<sup>-1</sup> in KBr pellets) of starting compounds and salts **4-5**.

|                                               | HATNA                                                                                                                                                                     | HATA                                                                                                                                                                    | CVCl                                                                                                                                                                                                                   | cryptand                                                                                                                                                                               | C <sub>6</sub> H <sub>4</sub> Cl <sub>2</sub>                                            | (CV <sup>+</sup> ) <sub>2</sub><br>{(Mn <sup>II</sup> Cl <sub>2</sub> ) <sub>3</sub><br>(HATA)} <sup>2-</sup> .<br>4C <sub>6</sub> H <sub>4</sub> Cl <sub>2</sub> ( <b>4</b> )                                        | {(K <sup>+</sup> )(crypt)} <sub>23</sub><br>{(Mn <sup>II</sup> I <sub>2</sub> ) <sub>3</sub> (HATNA)} <sup>3-</sup><br>·5C <sub>6</sub> H <sub>4</sub> Cl <sub>2</sub> ( <b>5</b> )             |
|-----------------------------------------------|---------------------------------------------------------------------------------------------------------------------------------------------------------------------------|-------------------------------------------------------------------------------------------------------------------------------------------------------------------------|------------------------------------------------------------------------------------------------------------------------------------------------------------------------------------------------------------------------|----------------------------------------------------------------------------------------------------------------------------------------------------------------------------------------|------------------------------------------------------------------------------------------|-----------------------------------------------------------------------------------------------------------------------------------------------------------------------------------------------------------------------|-------------------------------------------------------------------------------------------------------------------------------------------------------------------------------------------------|
| HAT                                           | HATNA<br>413m<br>501w<br>541w<br>606m<br>757s<br>771m<br>802w<br>1001w<br>1020w<br>1078s<br>1129w<br>1236w<br>1339m<br>1364m<br>1475w<br>1495m<br>1521w<br>1611w<br>3056w | HATA<br>420w<br>468w<br>493w<br>589w<br>620w<br>742s<br>840w<br>876m<br>1076s<br>1170w<br>1254w<br>1286w<br>1372w<br>1403s<br>1530w<br>1550w<br>1630m<br>2860w<br>2921w |                                                                                                                                                                                                                        |                                                                                                                                                                                        |                                                                                          | HATA<br>418w*<br>473w*<br>500w*<br>603w<br>645w<br>758w<br>837m*<br>864w<br>1065w<br>1172s*<br>1228w<br>1298w<br>1363s<br>1398w*<br>1525w*<br>1583s<br>-<br>2861w*<br>2921w*                                          | HATNA<br>412w*<br>504w*<br>524w<br>625s<br>753m*<br>-<br>790w<br>994s*<br>1032sh<br>1077w*<br>1131m*<br>1256m<br>1315sh<br>1355m<br>1467m*<br>-<br>1557s<br>-<br>3060w*                         |
| Cat <sup>+</sup>                              |                                                                                                                                                                           |                                                                                                                                                                         | CV <sup>+</sup><br>419w<br>501w<br>564w<br>598w<br>775w<br>839m<br>911m<br>985m<br>1066w<br>1074m<br>1094w<br>1139s<br>1207s<br>1266s<br>1272s<br>1297m<br>1340w<br>1356m<br>1378m<br>1427s<br>1452w<br>1462w<br>1485s | cryptand<br>476w<br>528w<br>735m<br>922m<br>948w<br>982m<br>1038w<br>1071m<br>1100s<br>1127s<br>1213w<br>1295m<br>1329m<br>1360s<br>1446m<br>1462m<br>1490w<br>2790w<br>2877w<br>2943w |                                                                                          | CV <sup>+</sup><br>418w*<br>500w*<br>558w*<br>603w*<br>758w<br>837m*<br>911w*<br>943m<br>1065w*<br>-<br>1122w<br>1146sh<br>1186w<br>1228w<br>-<br>1298w*<br>-<br>1363s*<br>1398w<br>1412w<br>1457m*<br>1473w<br>1506w | cryptand<br>457w<br>524w*<br>753m<br>903w<br>950s*<br>994s<br>1032sh*<br>1077w*<br>1102s*<br>1131m*<br>1201w<br>1300m*<br>1315sh<br>1355m*<br>1443w*<br>1467m*<br>-<br>2816w<br>2881m*<br>2957w |
| C <sub>6</sub> H <sub>4</sub> Cl <sub>2</sub> |                                                                                                                                                                           |                                                                                                                                                                         |                                                                                                                                                                                                                        |                                                                                                                                                                                        | C <sub>6</sub> H <sub>4</sub> Cl <sub>2</sub><br>657w<br>748s<br>1030m<br>1122m<br>1453m | C <sub>6</sub> H <sub>4</sub> Cl <sub>2</sub><br>668w<br>744w*<br>1030w*<br>1122w*<br>1457m*                                                                                                                          | C <sub>6</sub> H <sub>4</sub> Cl <sub>2</sub><br>668w*<br>753m*<br>1032sh*<br>1131m<br>1467m                                                                                                    |

\*bands coincide, w - weak, m - middle, s – strong, sh- shoulder .

IR-spectra of the complexes.

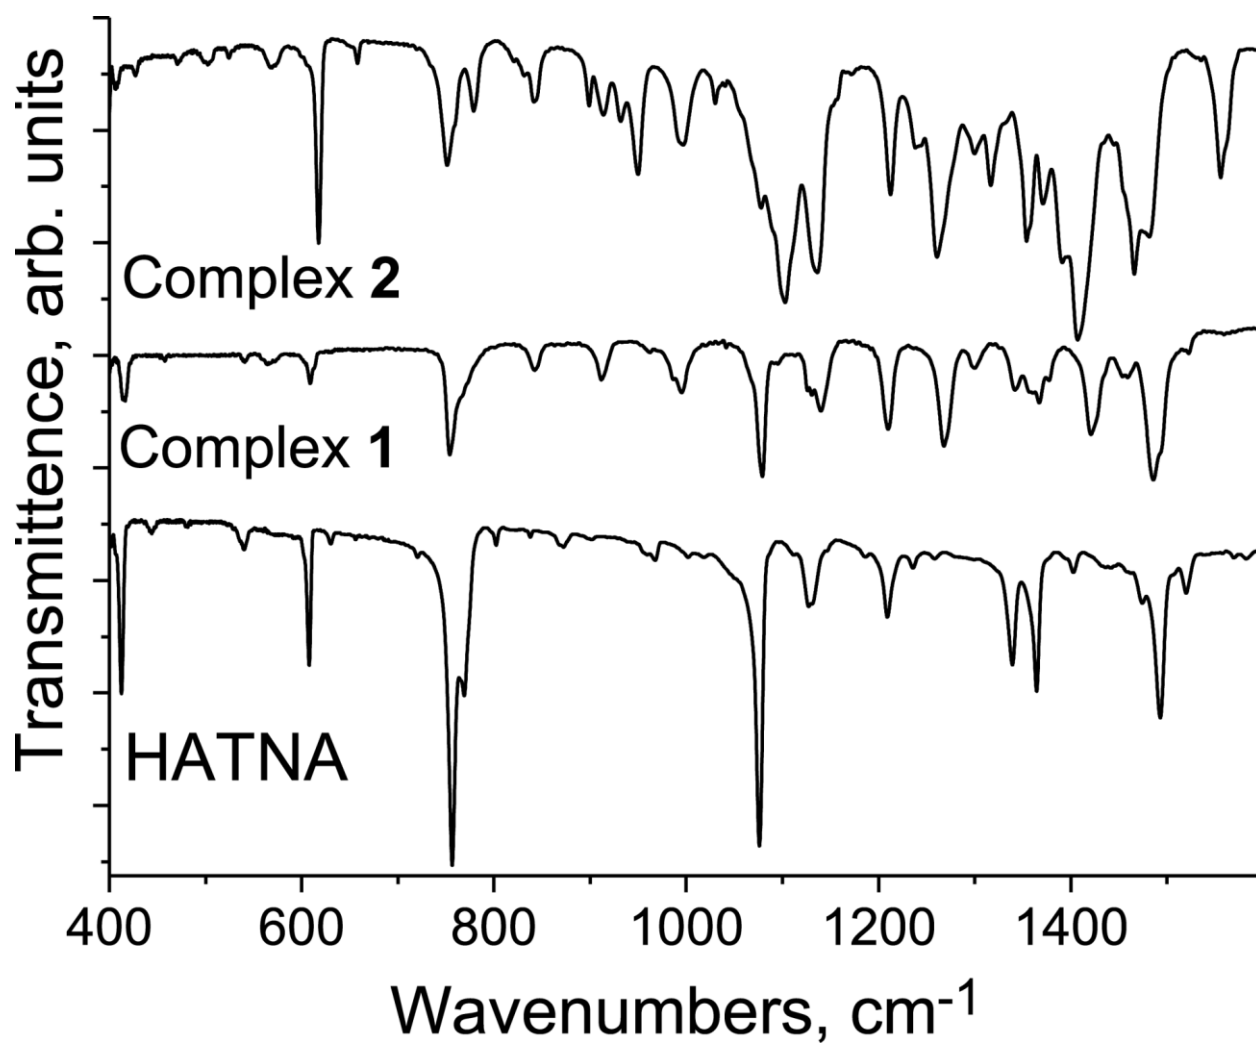

**Figure S1.** IR-spectrum of starting HATNA and the spectra of  $\{\text{Mn}^{\text{II}}(\text{dedtc})_2(\text{HATNA})\}$  (**1**) and  $\{(\text{K}^+)(\text{crypt})\}_2[\{\text{Mn}^{\text{II}}(\text{dedtc})_2\}_3(\text{HATNA})]^{2-} \cdot 2\text{C}_6\text{H}_4\text{Cl}_2$  (**2**) in KBr pellets. Pellets for **1** and **2** were prepared in anaerobic conditions.

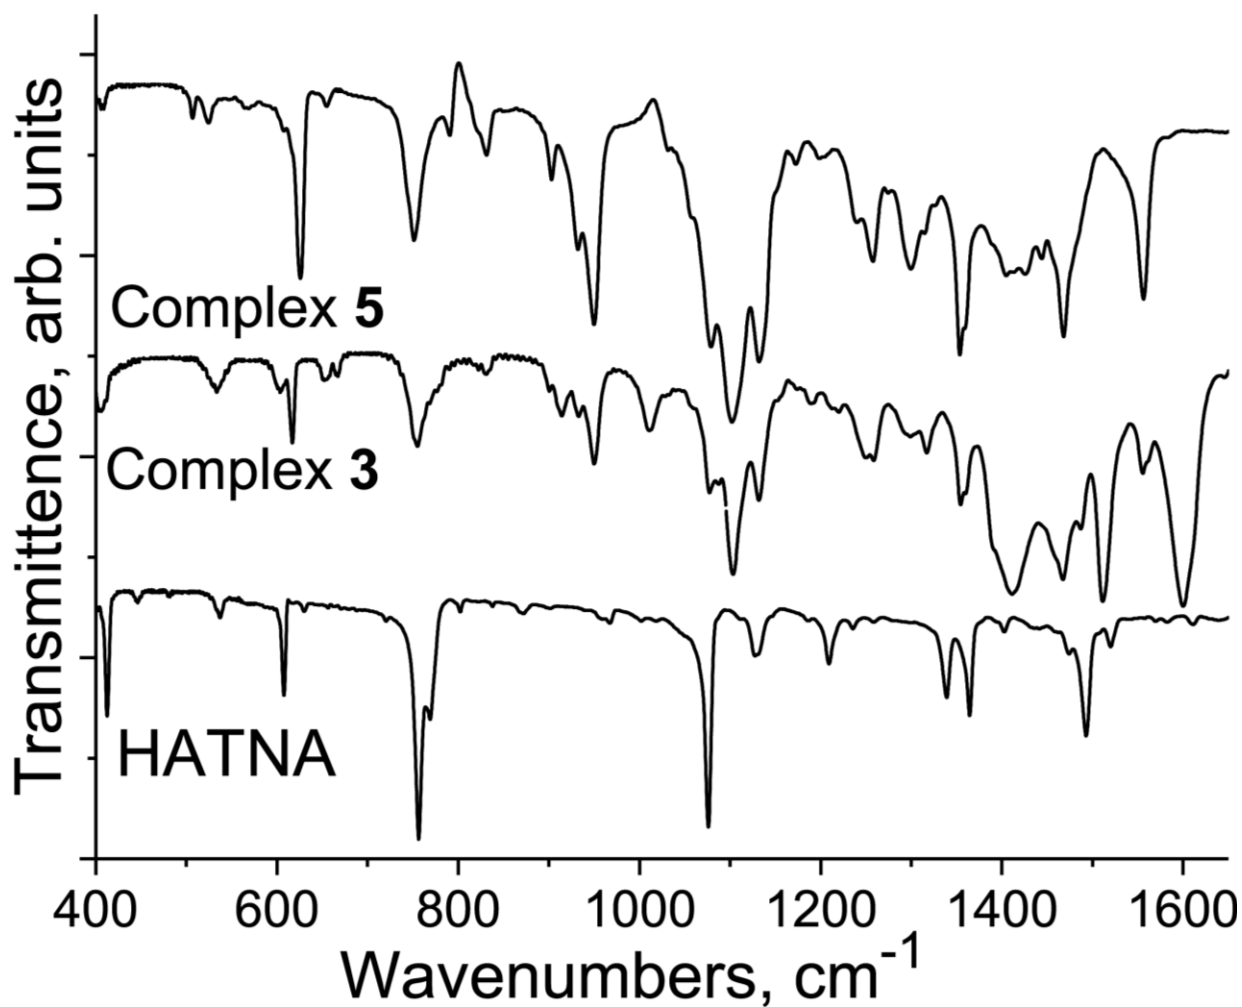

**Figure S2.** IR-spectrum of starting HATNA and the spectra of  $\{(K^+)(crypt)\}_2\{[Mn^{II}(acac)_2]_3(HATNA)\}^{2-} \cdot 2C_6H_4Cl_2 \cdot C_6H_{14}$  (**3**) and  $\{(K^+)(crypt)\}_3\{[Mn^{II}I_2]_3(HATNA)\}^{3-} \cdot 5C_6H_4Cl_2$  (**5**) in KBr pellets. Pellets for **3** and **5** were prepared in anaerobic conditions.

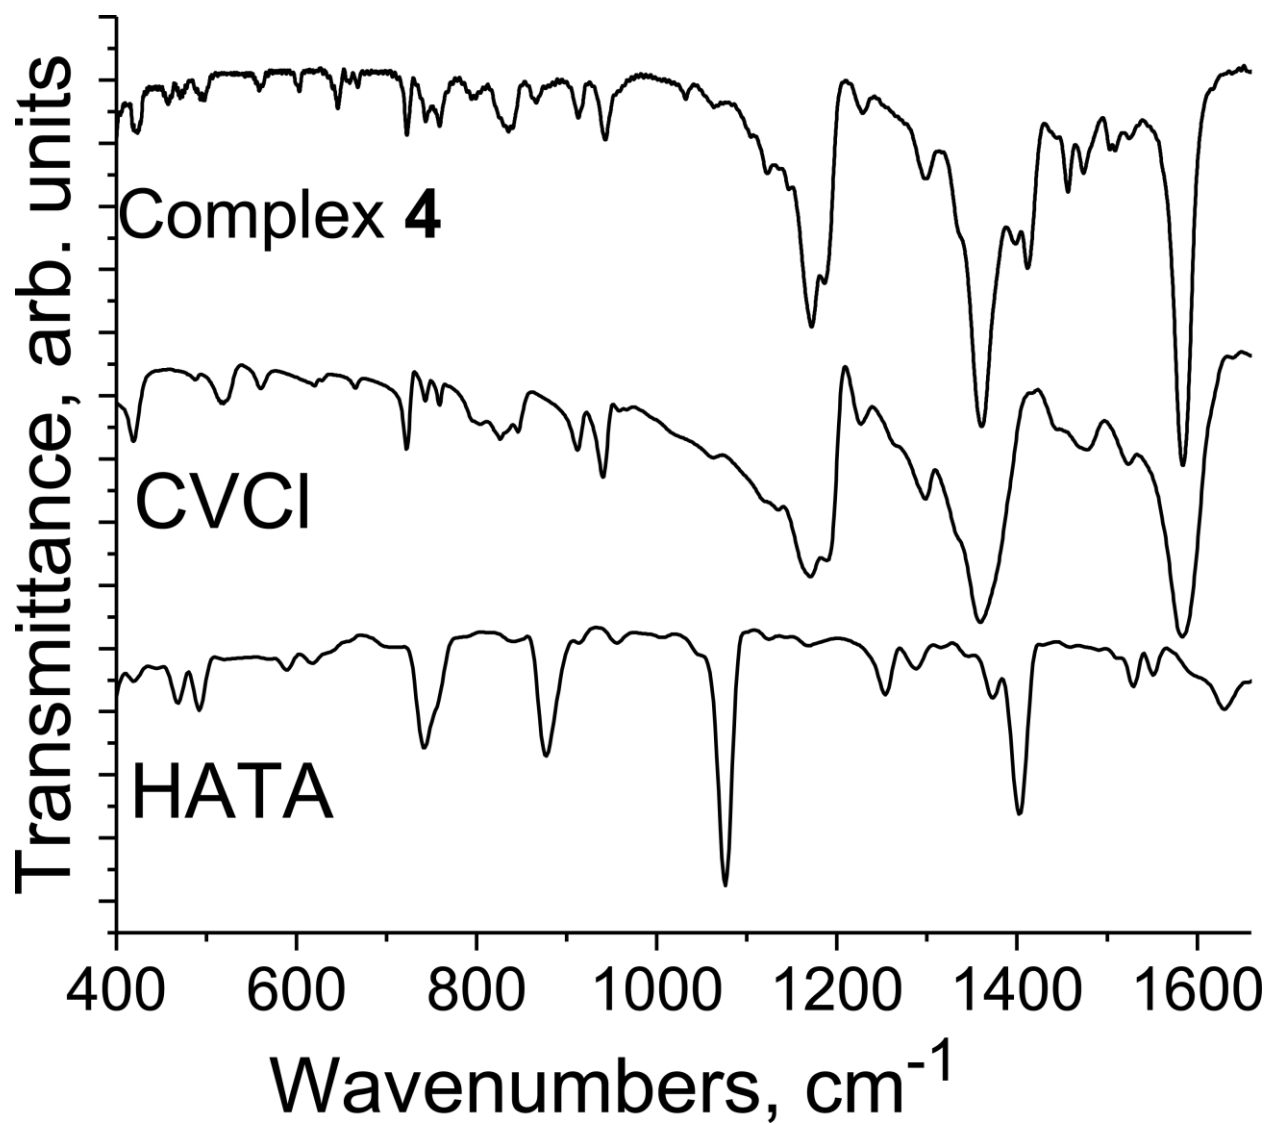

**Figure S3.** IR-spectra of starting HATA, salt CVCl and complex  $(CV^+)_2\{Mn^{II}Cl_2\}_3(HATA)\}^{2-}$ .

$4C_6H_4Cl_2$  (**4**) in KBr pellets. Pellet for **4** was prepared in anaerobic conditions.

Crystal structures of the complexes.

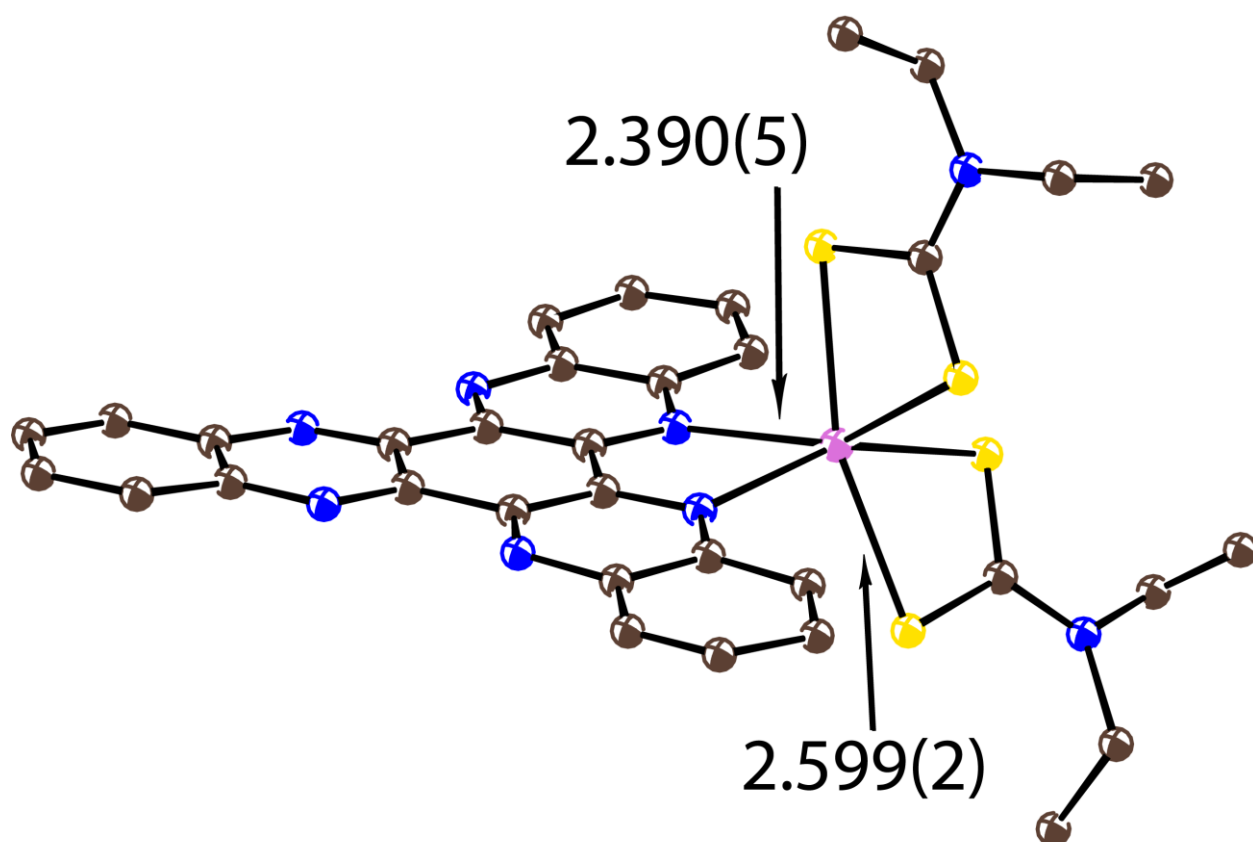

**Figure S4.** Molecular structure of  $[\{\text{Mn}^{\text{II}}(\text{dedtc})_2\}(\text{HATNA})]$  in **1**. The lengths of the Mn-N and Mn-S bonds are shown. Ortep drawing with equivalent isotropic atomic displacement parameters is shown. Carbon is brown, nitrogen is blue, manganese is pink, sulfur is yellow.

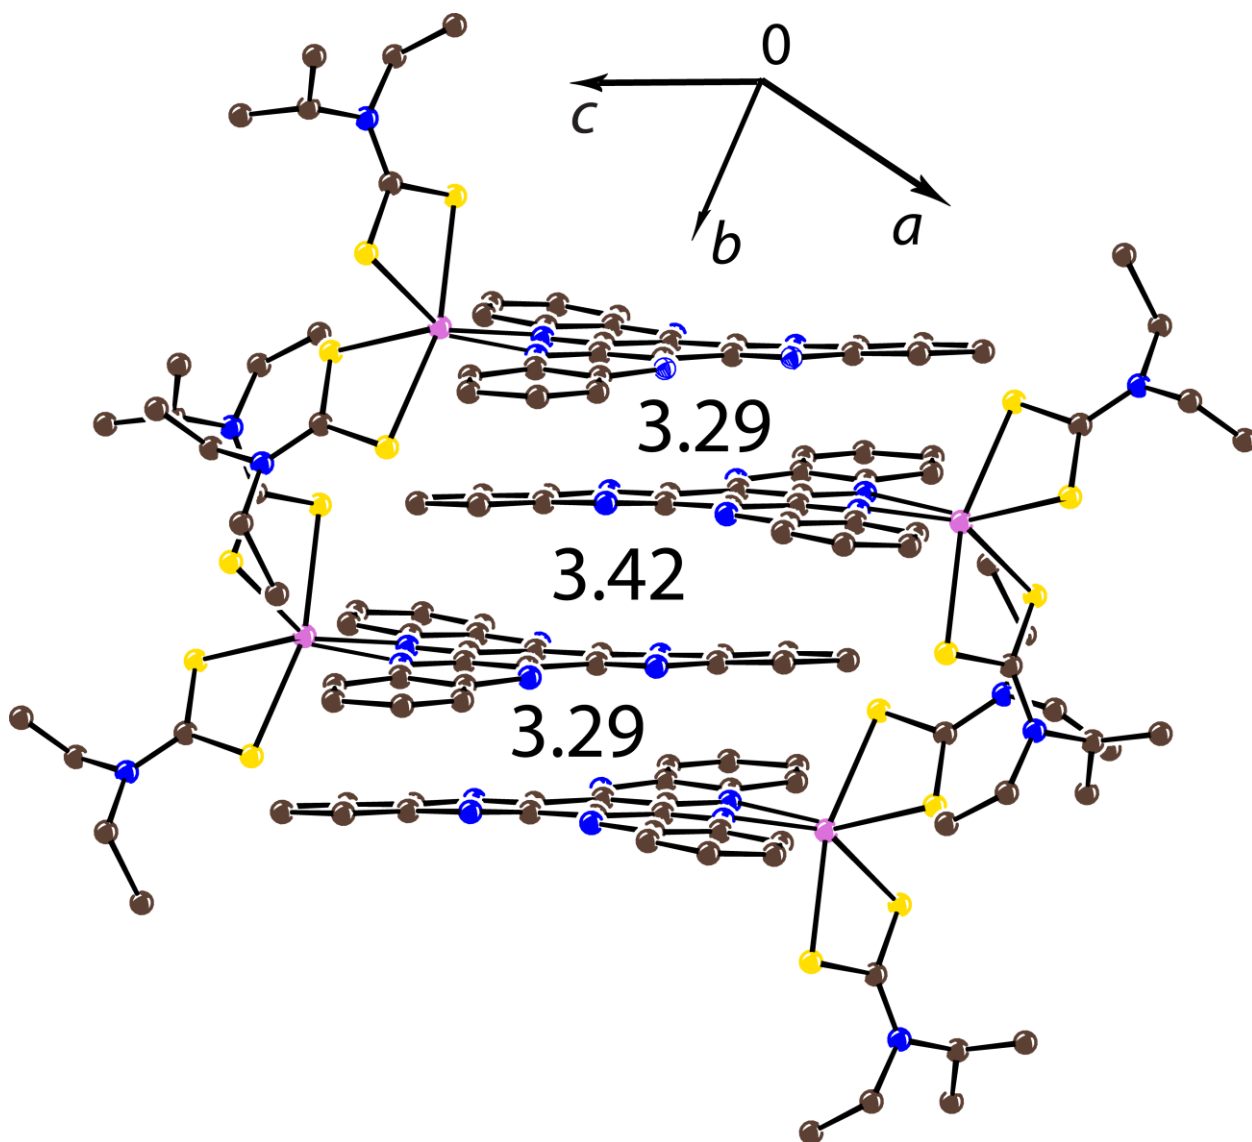

**Figure S5.** Crystal structure of **1**: view in the stacks from the HATNA molecules together with the interplanar distances is shown. Ortep drawing with equivalent isotropic atomic displacement parameters is shown. Only major occupied orientation is shown for ethyl-substituents of dtc. Carbon is brown, nitrogen is blue, manganese is pink, sulfur is yellow.



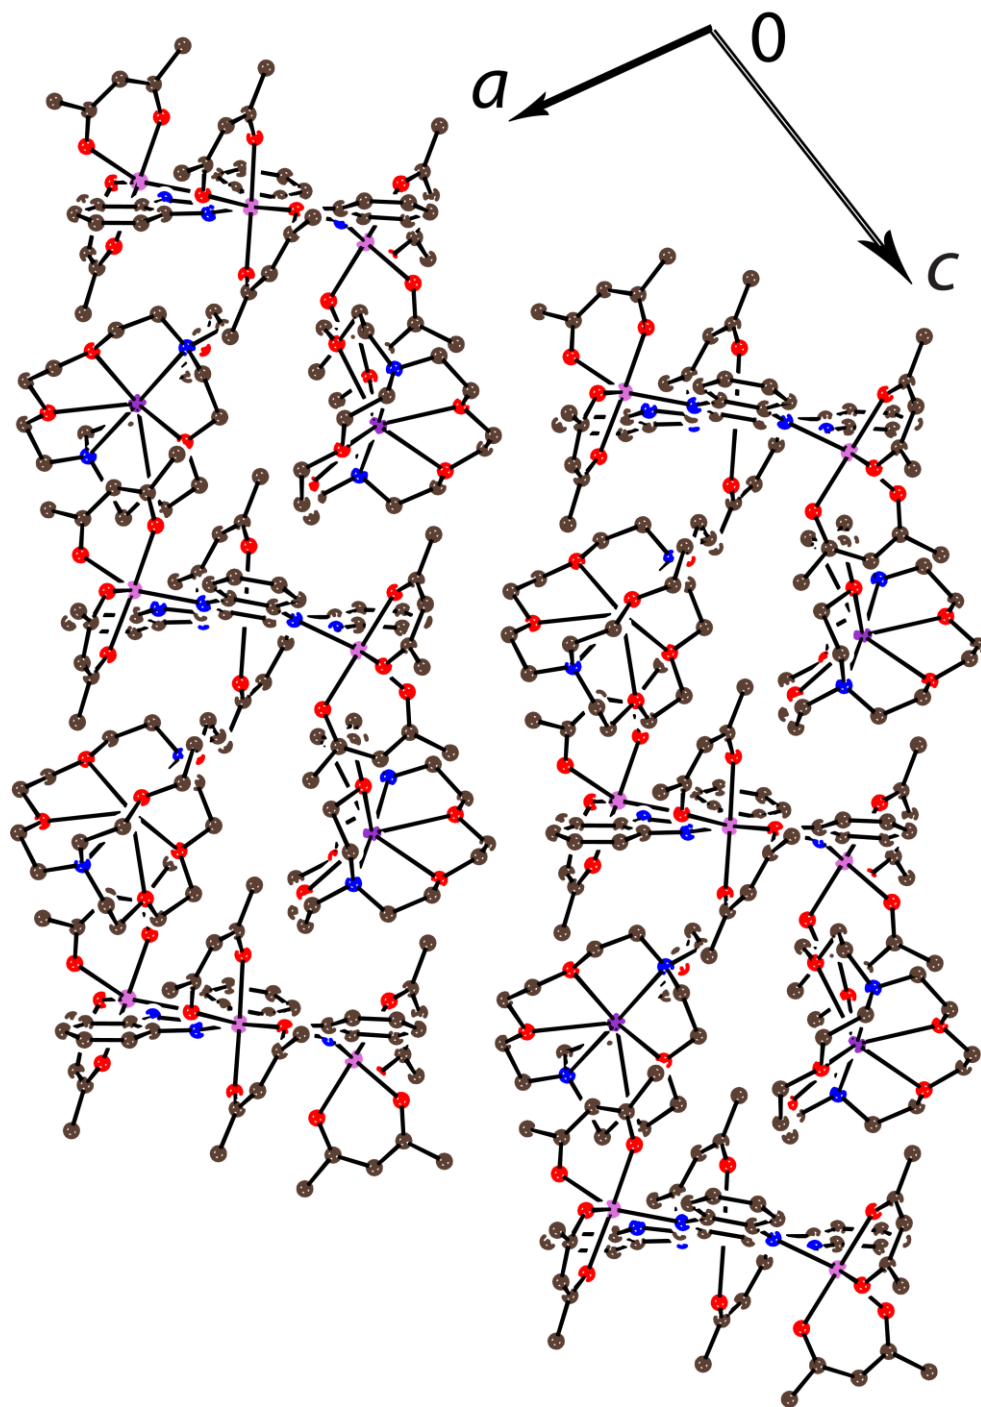

**Figure S6.** View on the  $[\{\text{Mn}^{\text{II}}(\text{acac})_2\}_3(\text{HATNA})]^{2-}$  dianions isolated by bulky  $\{\text{K}^+(\text{crypt})\}$  cations in **3** is shown. Solvents  $\text{C}_6\text{H}_4\text{Cl}_2$  and  $\text{C}_6\text{H}_{14}$  molecules are not shown for clarity. Ortep drawing with equivalent isotropic atomic displacement parameters is shown. Carbon is brown, nitrogen is blue, manganese is pink, oxygen is red.

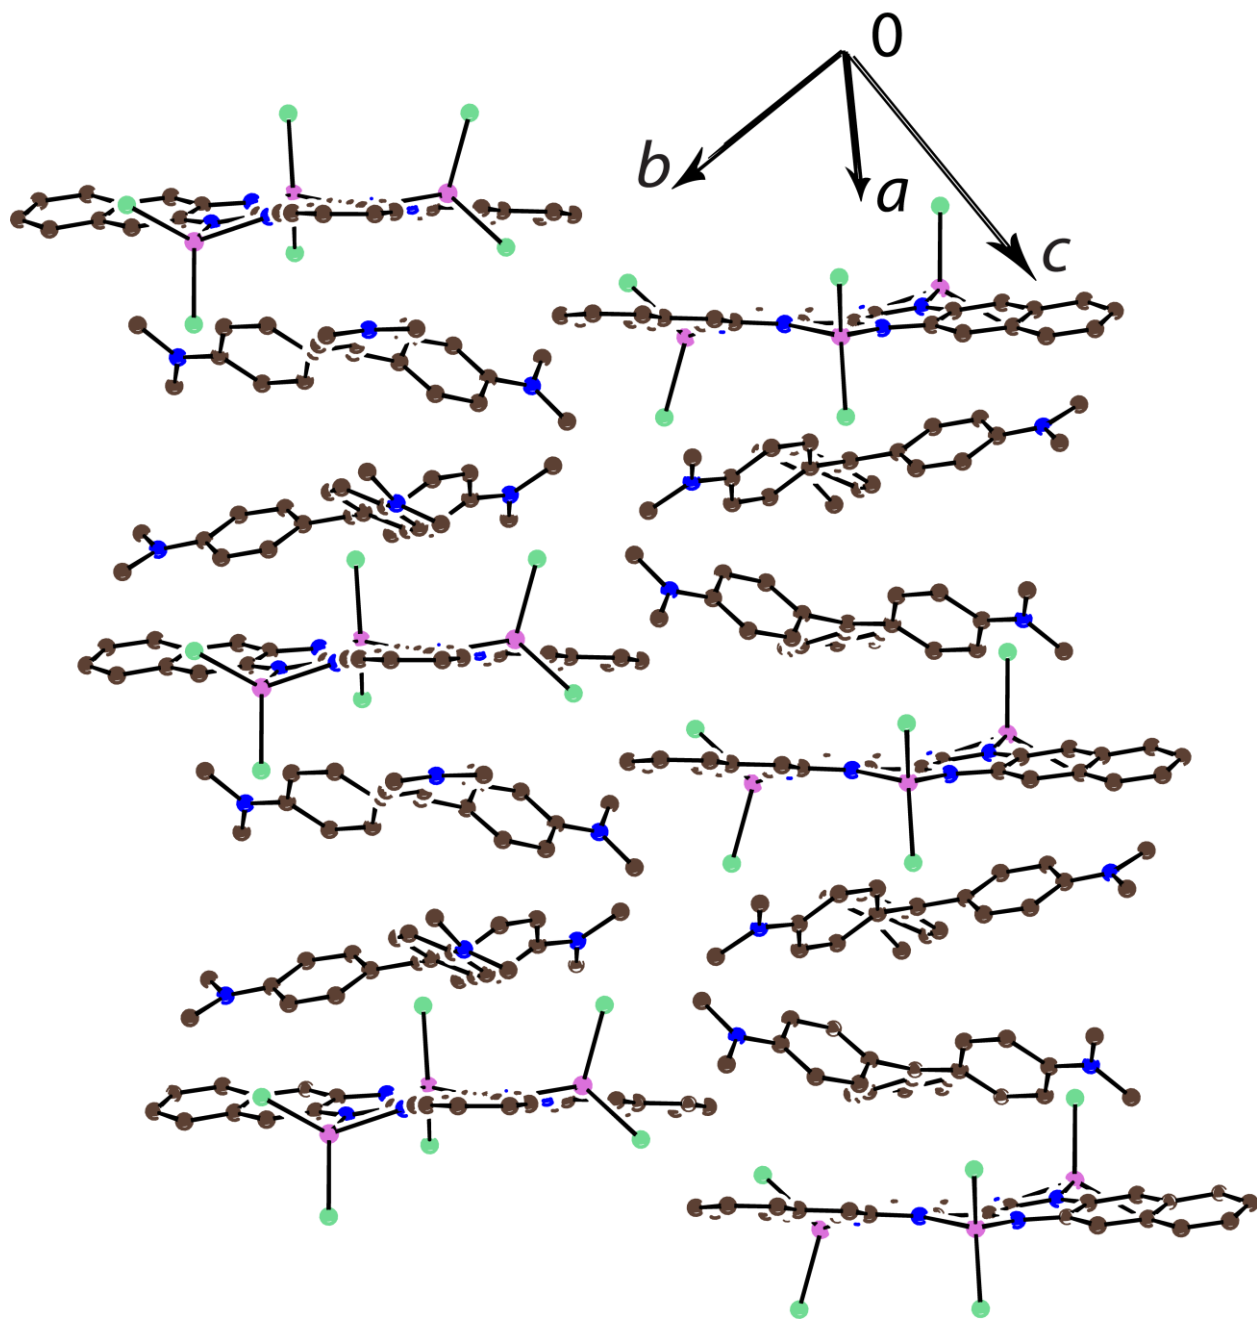

**Figure S7.** View on the  $\{(\text{Mn}^{\text{II}}\text{Cl}_2)_3(\text{HATA})\}^{2-}$  dianions in **4** separated by two  $\text{CV}^+$  cations is shown. Solvents  $\text{C}_6\text{H}_4\text{Cl}_2$  molecules are not shown for clarity. Ortep drawing with equivalent isotropic atomic displacement parameters is shown. Carbon is brown, nitrogen is blue, manganese is pink, chlorine is green.

**Table S3.** Shape analysis of the metal complexes **1-5** using SHAPE 2.1 software. The smaller value is, the closer geometry of the coordination polyhedron of a metal center gets to the perfect one. Non-equivalent manganese atoms are labeled as Mn<sup>n</sup>.

| Complexes           | Reference polyhedra  |                                 |                      |                                        |                                         |
|---------------------|----------------------|---------------------------------|----------------------|----------------------------------------|-----------------------------------------|
|                     | Hexagon ( $D_{6h}$ ) | Pentagonal pyramid ( $C_{5v}$ ) | Octahedron ( $O_h$ ) | Trigonal prism ( $D_{3h}$ )            | Johnson pentagonal pyramid ( $C_{5v}$ ) |
| Mn <sup>1</sup> (1) | 26.415               | 19.842                          | 13.038               | 15.526                                 | 20.964                                  |
|                     | Hexagon ( $D_{6h}$ ) | Pentagonal pyramid ( $C_{5v}$ ) | Octahedron ( $O_h$ ) | Trigonal prism ( $D_{3h}$ )            | Johnson pentagonal pyramid ( $C_{5v}$ ) |
| Mn <sup>1</sup> (2) | 26.410               | 17.038                          | 12.903               | 7.527                                  | 20.643                                  |
| Mn <sup>2</sup> (2) | 29.961               | 18.998                          | 13.722               | 11.205                                 | 20.611                                  |
| Mn <sup>3</sup> (2) | 25.700               | 16.856                          | 13.102               | 7.368                                  | 20.344                                  |
|                     | Hexagon ( $D_{6h}$ ) | Pentagonal pyramid ( $C_{5v}$ ) | Octahedron ( $O_h$ ) | Trigonal prism ( $D_{3h}$ )            | Johnson pentagonal pyramid ( $C_{5v}$ ) |
| Mn <sup>1</sup> (3) | 26.892               | 23.896                          | 7.047                | 11.656                                 | 25.674                                  |
| Mn <sup>2</sup> (3) | 29.168               | 21.816                          | 9.353                | 17.089                                 | 23.218                                  |
| Mn <sup>3</sup> (3) | 26.637               | 18.376                          | 11.426               | 16.532                                 | 19.719                                  |
|                     | Square ( $D_{4h}$ )  | Tetrahedron ( $T_d$ )           | Seesaw ( $C_{2v}$ )  | Vacant trigonal bipyramid ( $C_{3v}$ ) | -                                       |
| Mn <sup>1</sup> (4) | 21.013               | 14.205                          | 13.964               | 11.057                                 | -                                       |
| Mn <sup>2</sup> (4) | 31.117               | 15.057                          | 12.092               | 13.002                                 | -                                       |
| Mn <sup>3</sup> (4) | 33.767               | 18.396                          | 10.485               | 12.111                                 | -                                       |
|                     | Square ( $D_{4h}$ )  | Tetrahedron ( $T_d$ )           | Seesaw ( $C_{2v}$ )  | Vacant trigonal bipyramid ( $C_{3v}$ ) | -                                       |
| Mn <sup>1</sup> (5) | 26.989               | 13.041                          | 6.670                | 11.209                                 | -                                       |
| Mn <sup>2</sup> (5) | 30.517               | 17.154                          | 15.506               | 12.294                                 | -                                       |
| Mn <sup>3</sup> (5) | 31.925               | 15.864                          | 14.715               | 10.383                                 | -                                       |

### Fitting of magnetic data by PHI.

Spin Hamiltonians  $\hat{H}_1$  for **2** and **4** and  $\hat{H}_2$  for **5**, respectively:

$$\hat{H}_1 = -2J \cdot \sum_{i,j \in \{1,2,3\}} \vec{\hat{S}}_i \cdot \vec{\hat{S}}_j + D \cdot \sum_{i=1}^3 (\hat{S}_{zi}^2 - \frac{1}{3} \cdot \vec{\hat{S}}_i^2) + \mu_B g_{Mn} \sum_{i=1}^3 \vec{\hat{S}}_i \cdot \vec{H}$$

$$\hat{H}_2 = -2J_1 \cdot \sum_{i=1}^3 \vec{\hat{S}}_i \cdot \vec{\hat{S}}_4 - 2J_2 \cdot \sum_{i,j \in \{1,2,3\}} \vec{\hat{S}}_i \cdot \vec{\hat{S}}_j + D \cdot \sum_{i=1}^3 (\hat{S}_{zi}^2 - \frac{1}{3} \cdot \vec{\hat{S}}_i^2) + \mu_B (g_{Mn} \sum_{i=1}^3 \vec{\hat{S}}_i + g_{HAT} \vec{\hat{S}}_4) \cdot \vec{H}$$

where  $\vec{\hat{S}}_1$ ,  $\vec{\hat{S}}_2$ , and  $\vec{\hat{S}}_3$  denote the Mn<sup>II</sup> spins,  $\vec{\hat{S}}_4$  denotes the HATNA<sup>•3-</sup> trianionic radical spin,  $J_1$  denotes the Mn<sup>II</sup>–HATNA<sup>•3-</sup>,  $J$  and  $J_2$  denote Mn<sup>II</sup>–Mn<sup>II</sup> exchange values, respectively,  $g_{Mn}$  is the Mn<sup>II</sup> g-factor, and  $g_{HAT}$  is the HATNA<sup>•3-</sup> g-factor (fixed at 2.0).

Magnetic data for 2.

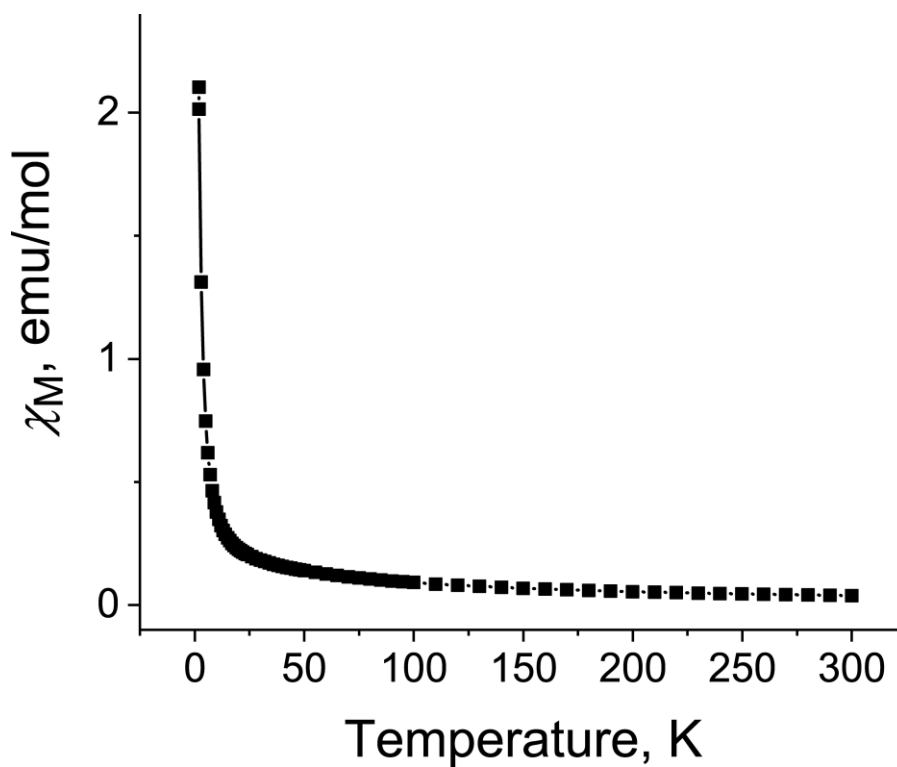

**Fig. S8.** Temperature dependence of molar magnetic susceptibility of polycrystalline **2** in the 1.9-300 K range.

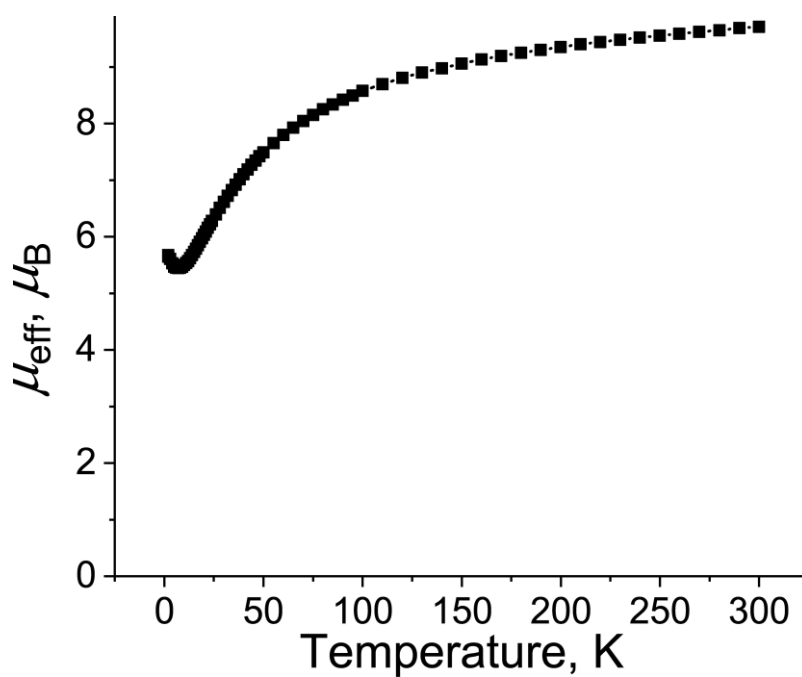

**Fig. S9.** Temperature dependence of effective magnetic moment of polycrystalline **2** in the 1.9-300 K range.

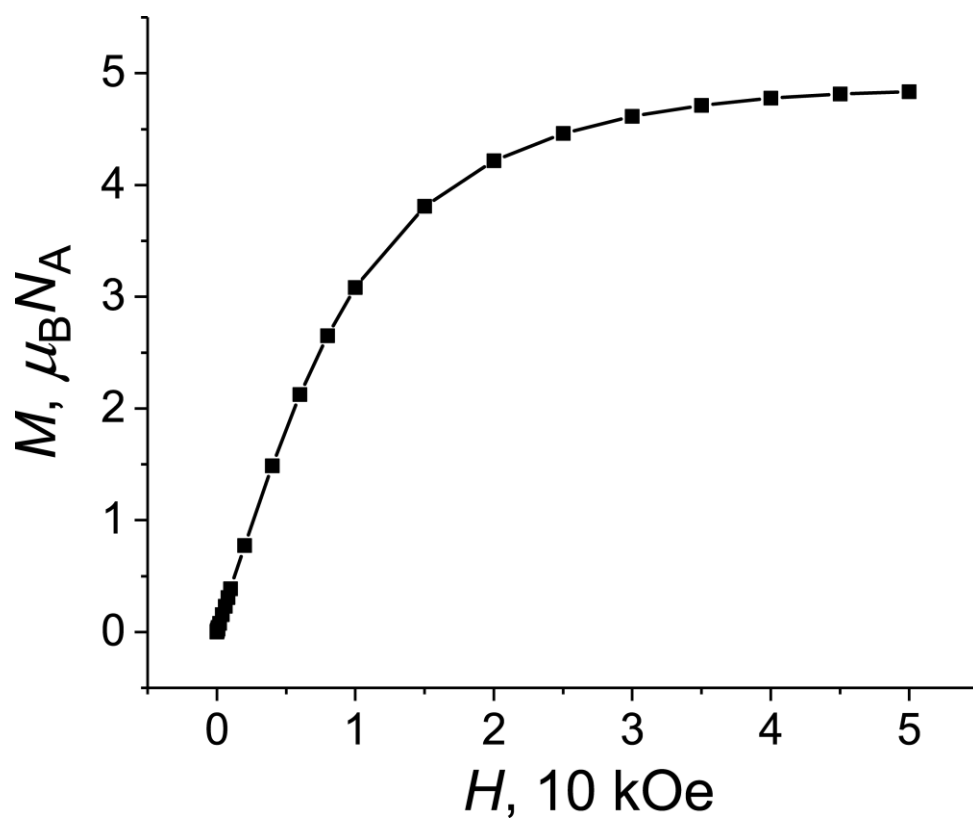

**Fig. S10.** Dependence of magnetization of polycrystalline **2** vs magnetic field up to 5 kOe magnetic field at 2K (black line is a guide to the eye).

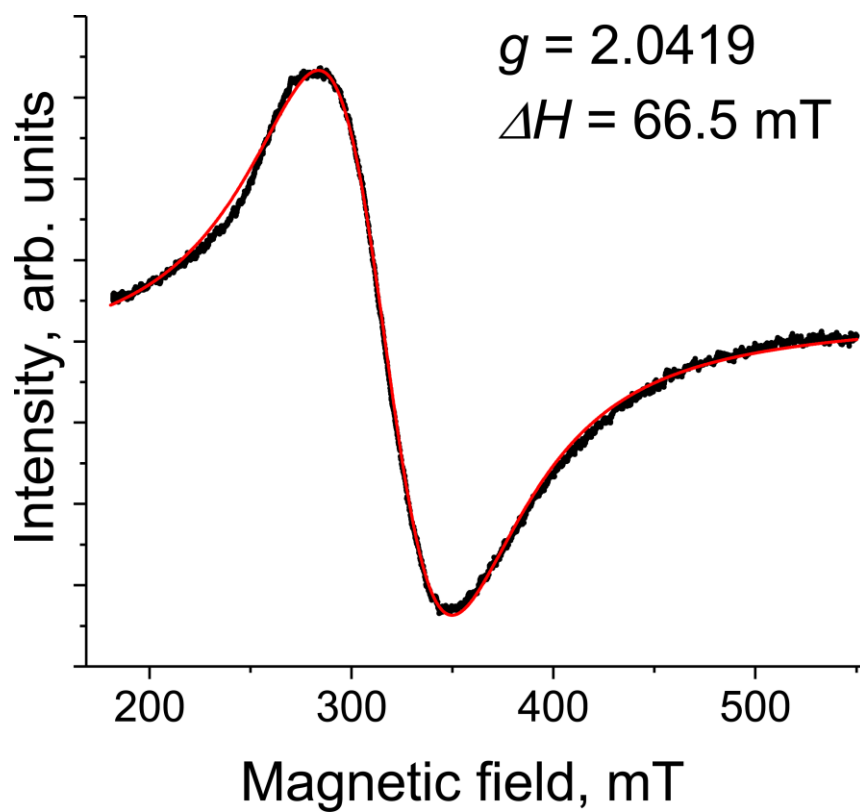

**Fig. S11.** Isotropic EPR signal from polycrystalline **2** at 100 K.

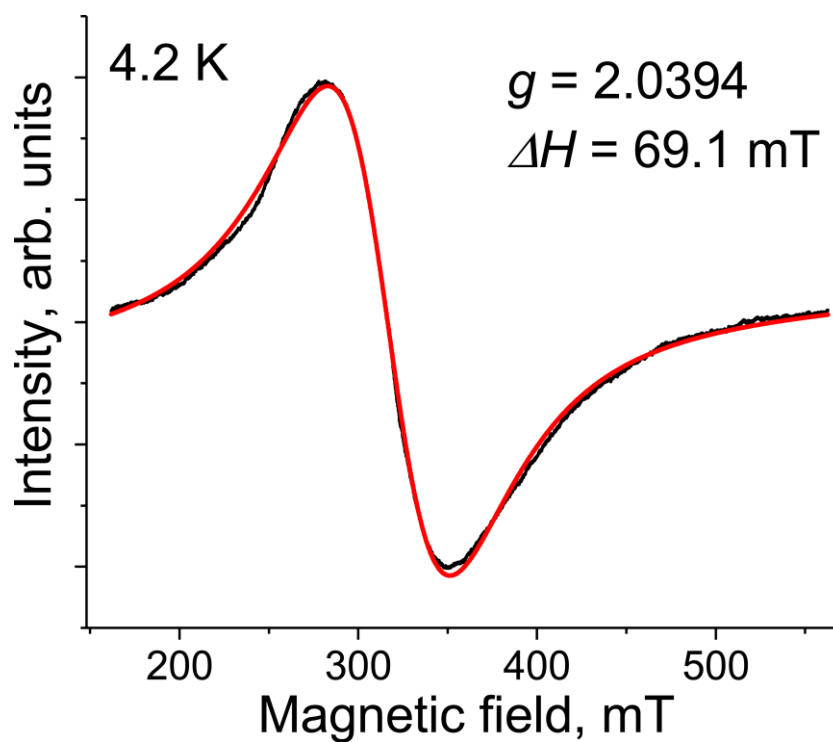

**Fig. S12.** Isotropic EPR signal from polycrystalline **2** at 4.2 K.

Magnetic data for 4.

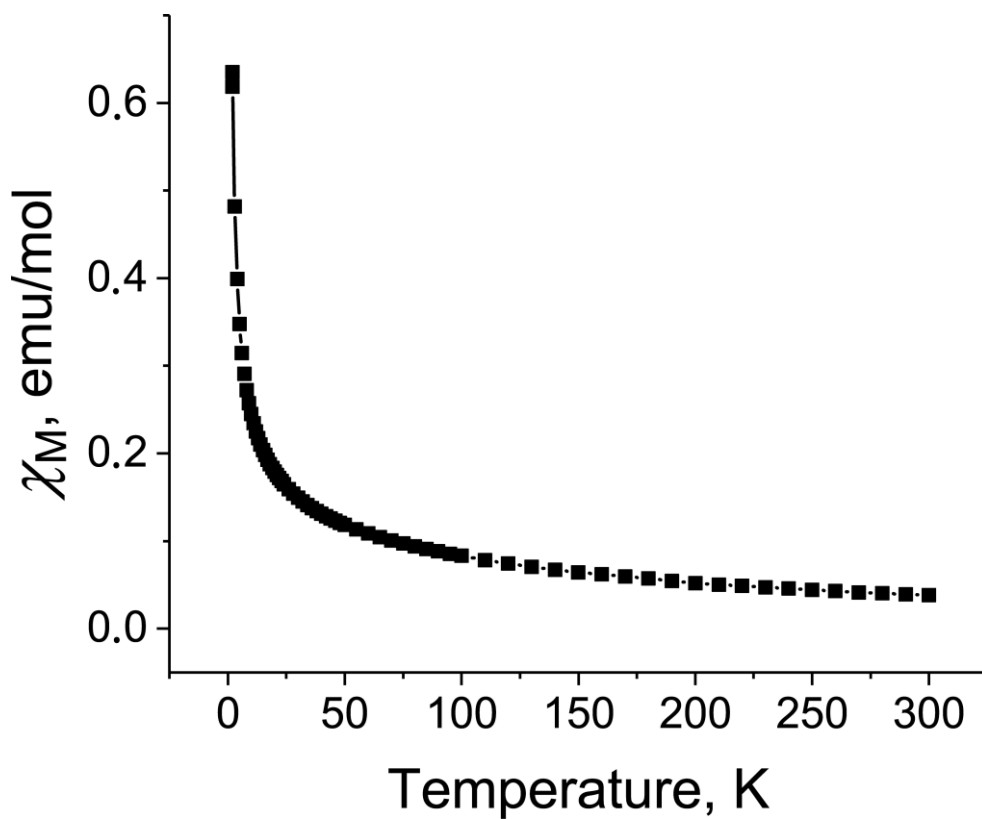

**Fig. S13.** Temperature dependence of molar magnetic susceptibility of polycrystalline 4 in the 1.9-300 K range.

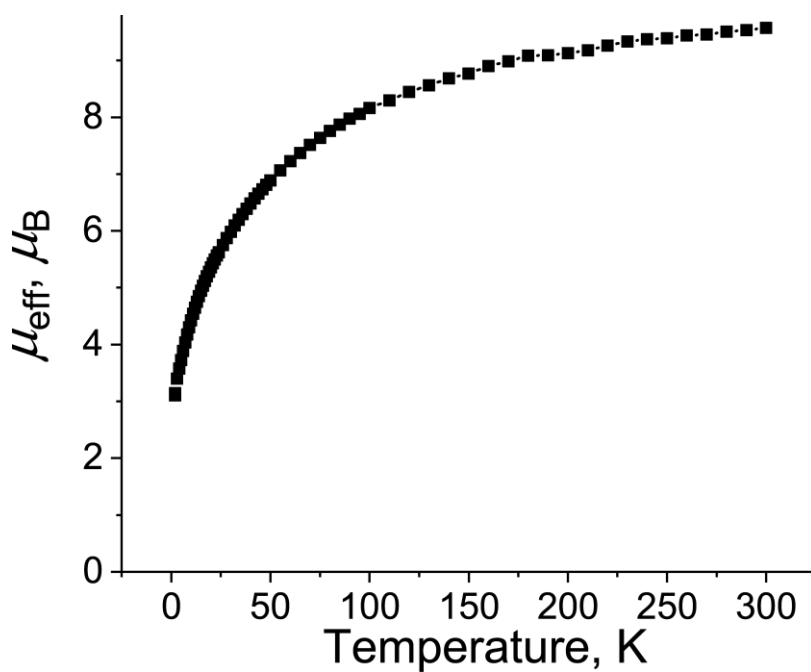

**Fig. S14.** Temperature dependence of effective magnetic moment of polycrystalline 4 in the 1.9-300 K range.



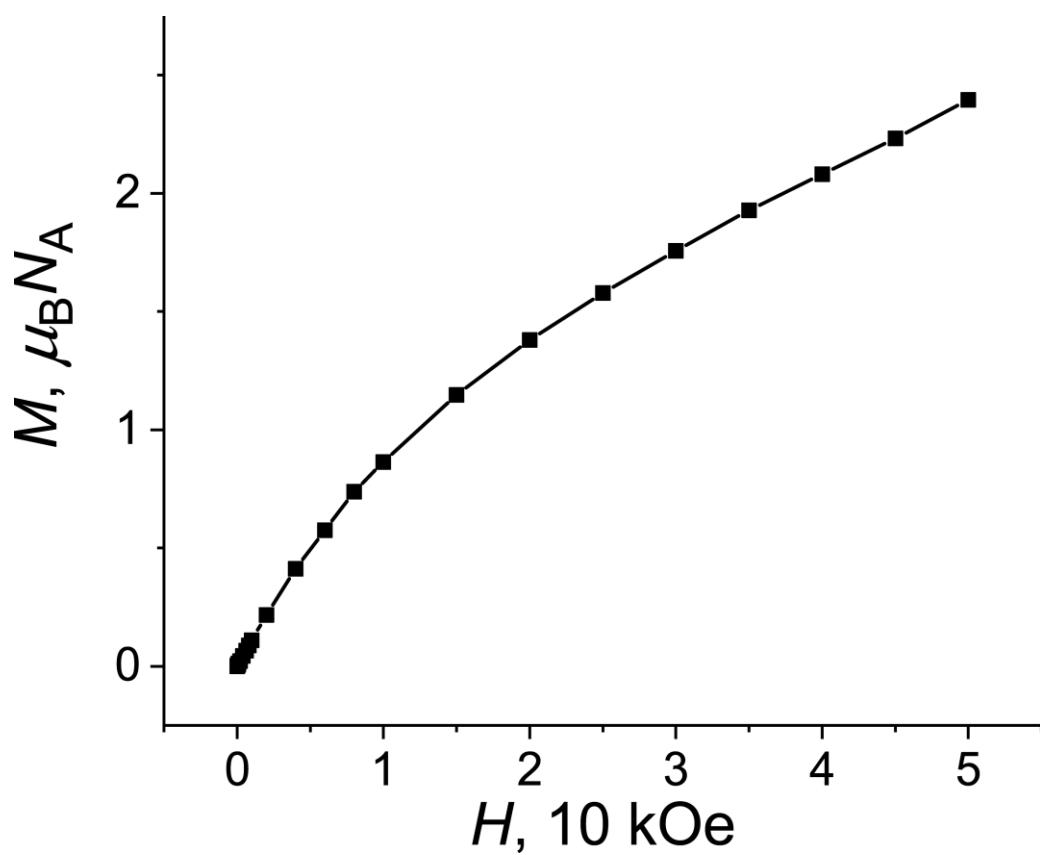

**Fig. S15.** Dependence of magnetization of polycrystalline **4** vs magnetic field up to 5 kOe magnetic field at 2K (black line is a guide to the eye)

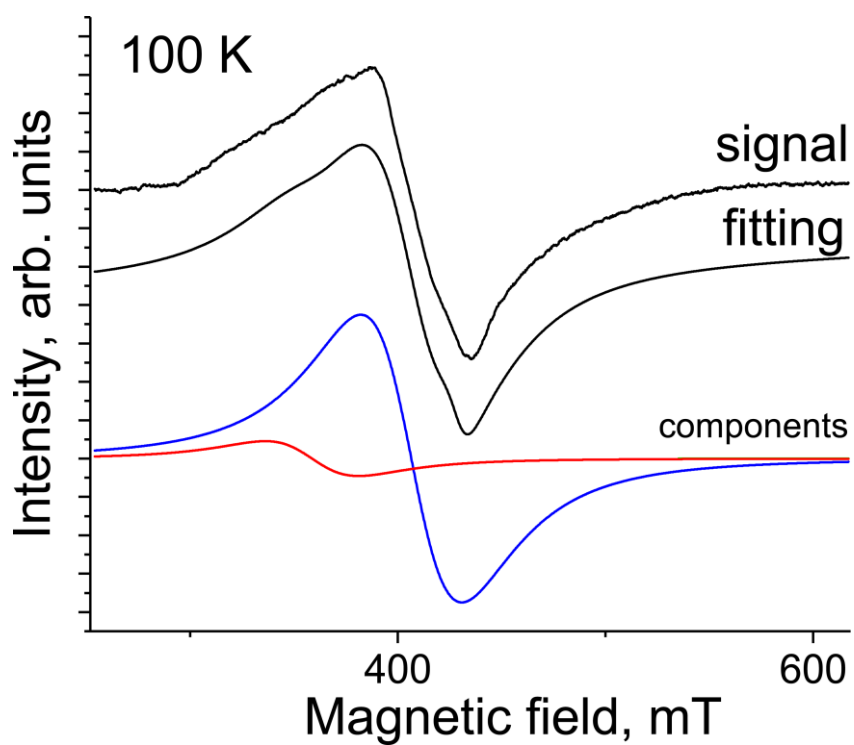

**Fig. S16.** EPR signal from polycrystalline **4** at 100 K.

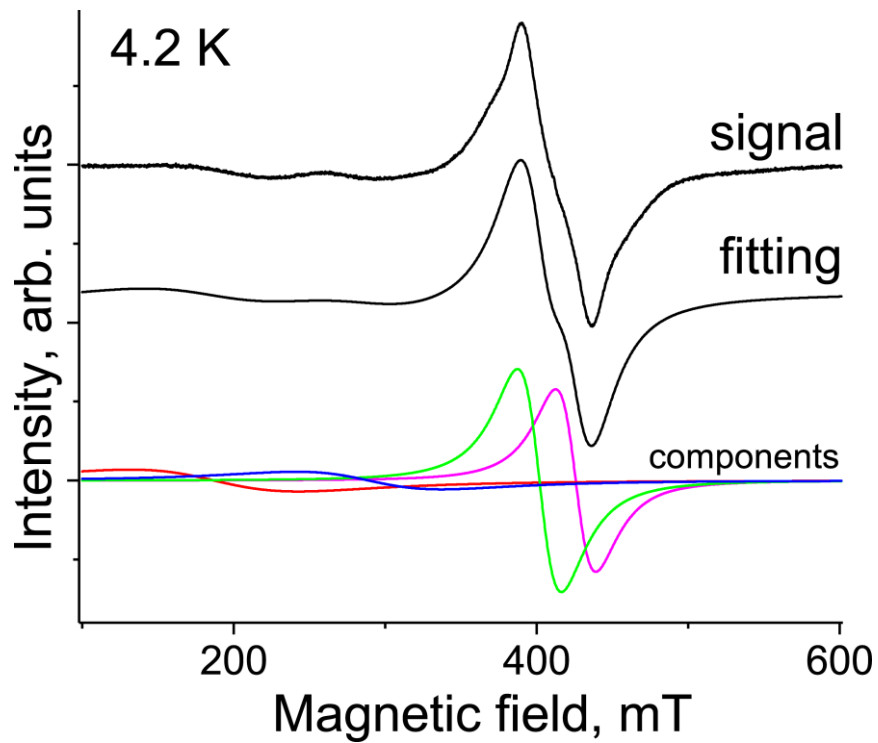

**Fig. S17.** EPR signal from polycrystalline **4** at 4.2 K.

### Magnetic properties of **5**.

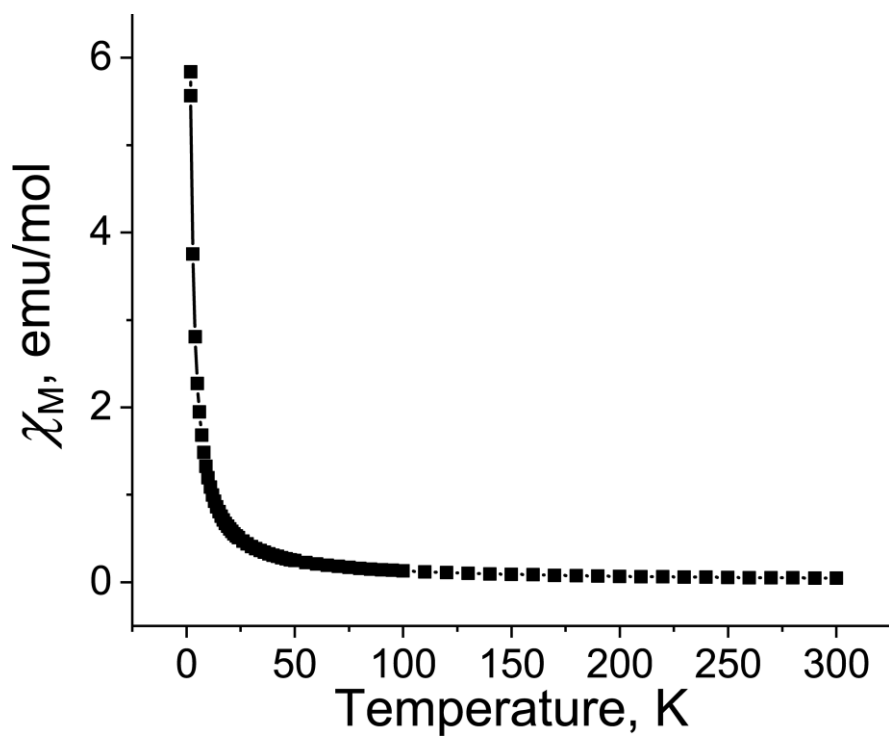

**Fig. S18.** Temperature dependence of molar magnetic susceptibility of polycrystalline **5** in the 1.9-300 K range.

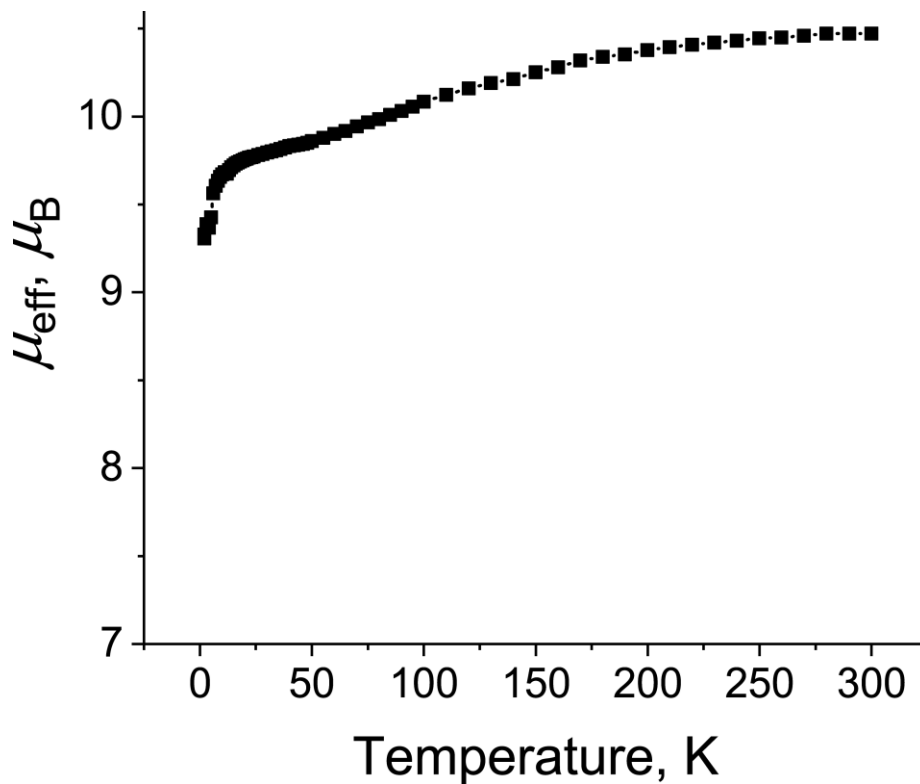

**Fig. S19.** Temperature dependence of effective magnetic moment of polycrystalline **5** in the 1.9-300 K range.

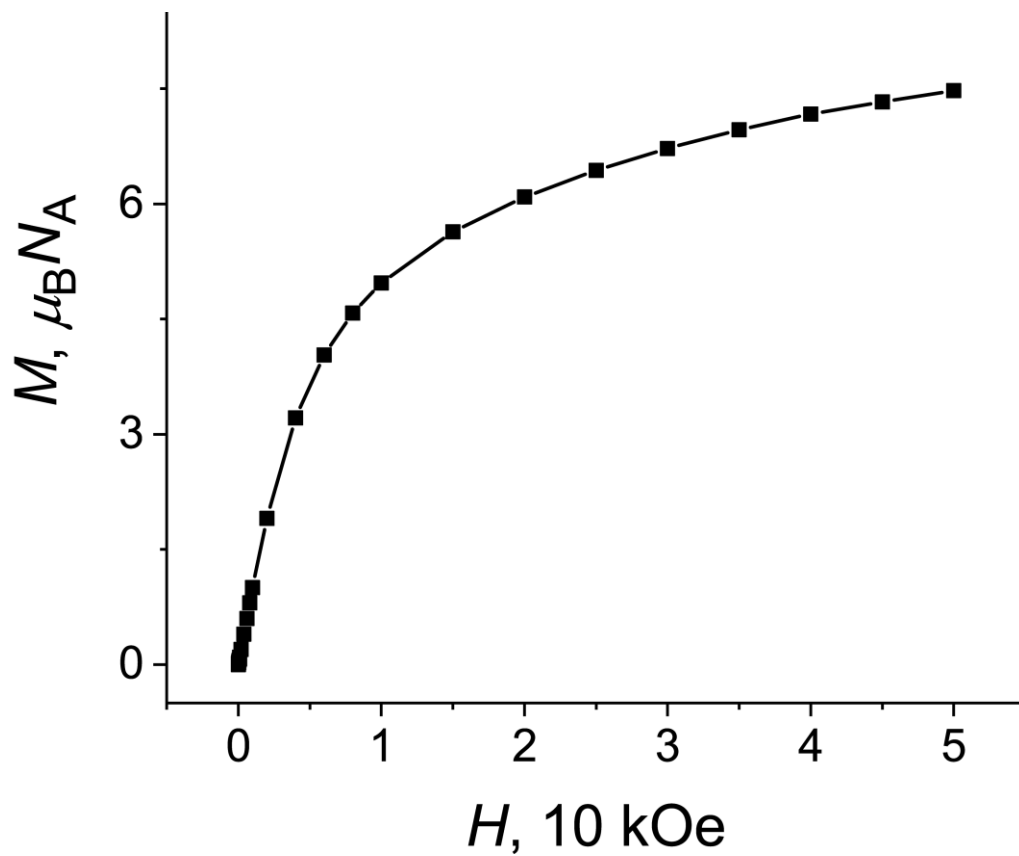

**Fig. S20.** Dependence of magnetization of polycrystalline **5** vs magnetic field up to 5 kOe magnetic field at 2K (black line is a guide to the eye)

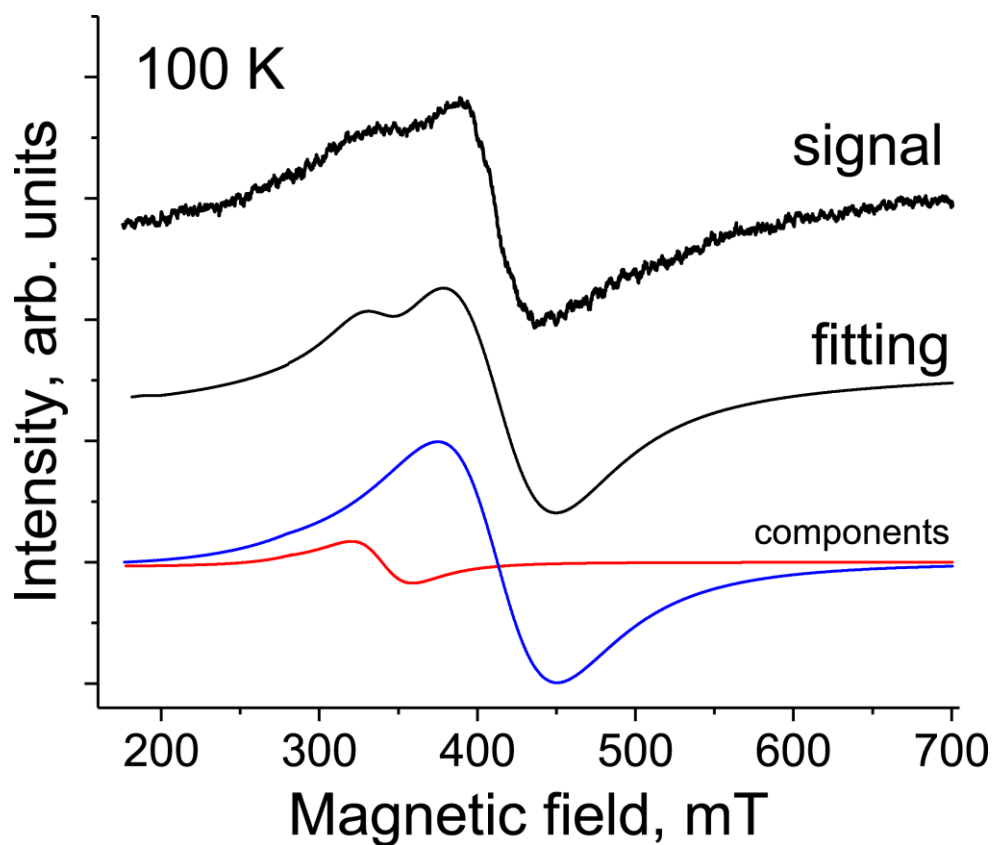

**Figure S21.** EPR signal from polycrystalline sample of **5** measured at 100 K.

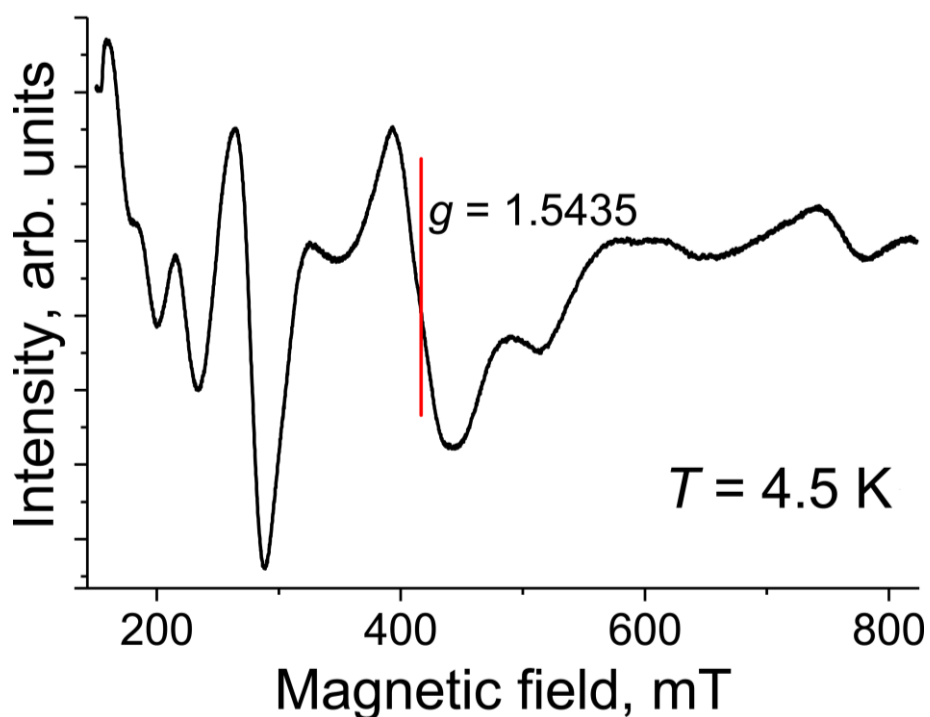

**Figure S22.** EPR signal from polycrystalline sample of **5** measured at 4.5 K.
